# Supplementary material for: Hemimycalins C–E; Cytotoxic and Antimicrobial Alkaloids with Hydantoin and 2-Iminoimidazolidin-4-one Backbones from the Red Sea Marine Sponge Hemimycale sp
Source: MDPI journal article supplement (doi:10.3390/md19120691), 2021-12-02
Supplement: s1 [file s1]

# Supporting Information

|                                                                                              |    |
|----------------------------------------------------------------------------------------------|----|
| Figure S1. $^1\text{H}$ NMR spectrum of hemimycalin C ( <b>1</b> ) .....                     | 1  |
| Figure S2. Expansion of $^1\text{H}$ NMR spectrum of hemimycalin C ( <b>1</b> ) .....        | 1  |
| Figure S3. $^{13}\text{C}$ NMR spectrum of hemimycalin C ( <b>1</b> ) .....                  | 2  |
| Figure S4. DEPT spectrum of hemimycalin C ( <b>1</b> ) .....                                 | 2  |
| Figure S5. Multiplicity-edited HSQC spectrum of hemimycalin C ( <b>1</b> ) .....             | 3  |
| Figure S6. $^1\text{H}$ - $^{13}\text{C}$ HMBC spectrum of hemimycalin C ( <b>1</b> ) .....  | 4  |
| Figure S7. $^1\text{H}$ NMR spectrum of hemimycalin D ( <b>2</b> ) .....                     | 5  |
| Figure S8. Expansion of $^1\text{H}$ NMR spectrum of hemimycalin D ( <b>2</b> ) .....        | 5  |
| Figure S9. $^{13}\text{C}$ NMR spectrum of hemimycalin D ( <b>2</b> ) .....                  | 6  |
| Figure S10. Multiplicity-edited HSQC spectrum of hemimycalin D ( <b>2</b> ) .....            | 7  |
| Figure S11. $^1\text{H}$ - $^{13}\text{C}$ HMBC spectrum of hemimycalin D ( <b>2</b> ) ..... | 8  |
| Figure S12. $^1\text{H}$ NMR spectrum of hemimycalin E ( <b>3</b> ) .....                    | 9  |
| Figure S13. Expansion of $^1\text{H}$ NMR spectrum of hemimycalin E ( <b>3</b> ) .....       | 9  |
| Figure S14. $^{13}\text{C}$ NMR spectrum of hemimycalin E ( <b>3</b> ) .....                 | 10 |
| Figure S15. Multiplicity-edited HSQC spectrum of hemimycalin E ( <b>3</b> ) .....            | 11 |
| Figure S16. $^1\text{H}$ - $^{13}\text{C}$ HMBC spectrum of hemimycalin E ( <b>3</b> ) ..... | 12 |
| Figure S17. $^1\text{H}$ - $^1\text{H}$ NOESY spectrum of hemimycalin E ( <b>3</b> ) .....   | 13 |
| Figure S18. Dose response curves of compounds <b>1-3</b> against MDA-MB-231 .....            | 14 |
| Figure S19. Dose response curves of compounds <b>1-3</b> against HCT116 .....                | 15 |

**Figure S1.**  $^1\text{H}$  NMR spectrum of hemimycalin C (**1**) ( $\text{DMSO-}d_6$ ).

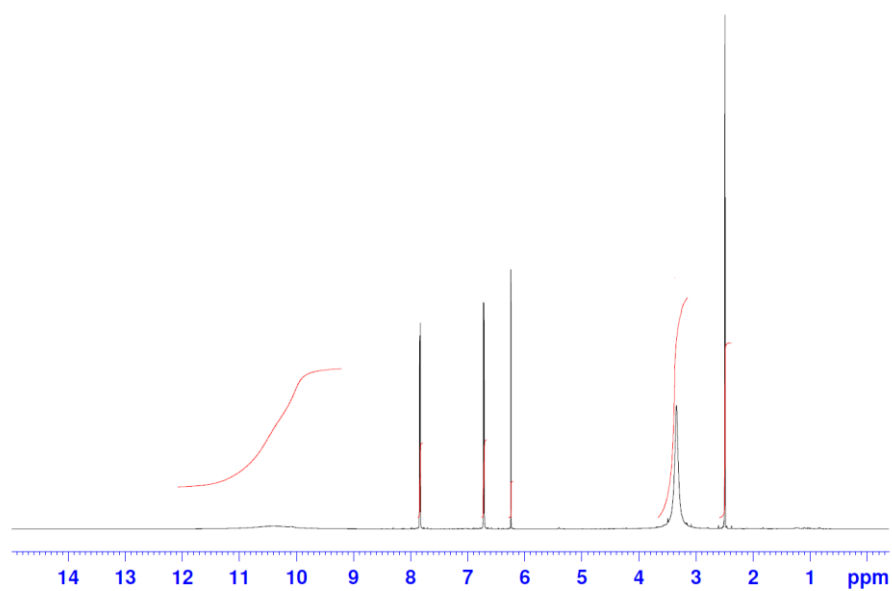

**Figure S2.** Expansion of  $^1\text{H}$  NMR spectrum of hemimycalin C (**1**) ( $\text{DMSO-}d_6$ ).

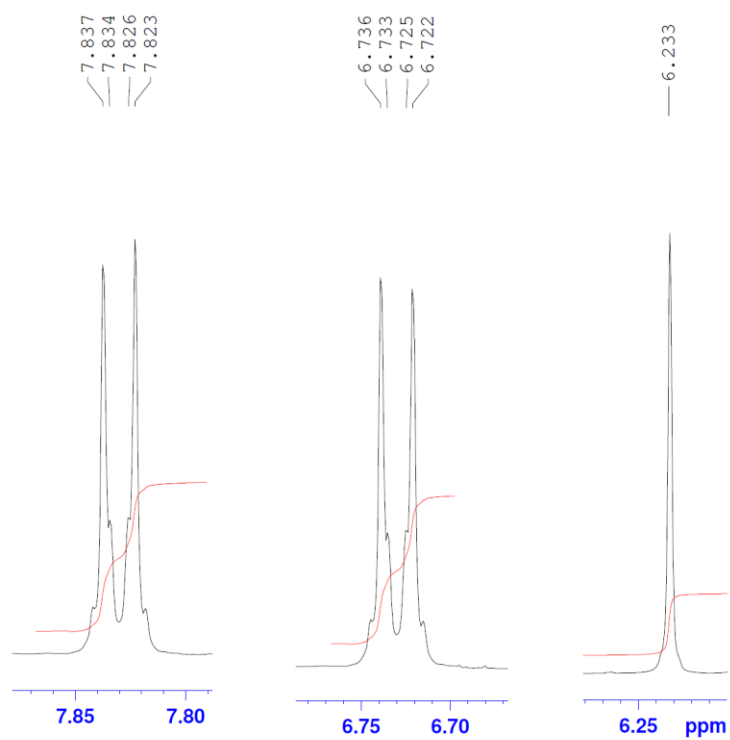

**Figure S3.**  $^{13}\text{C}$  NMR spectrum of hemimycalin C (**1**) ( $\text{DMSO}-d_6$ ).

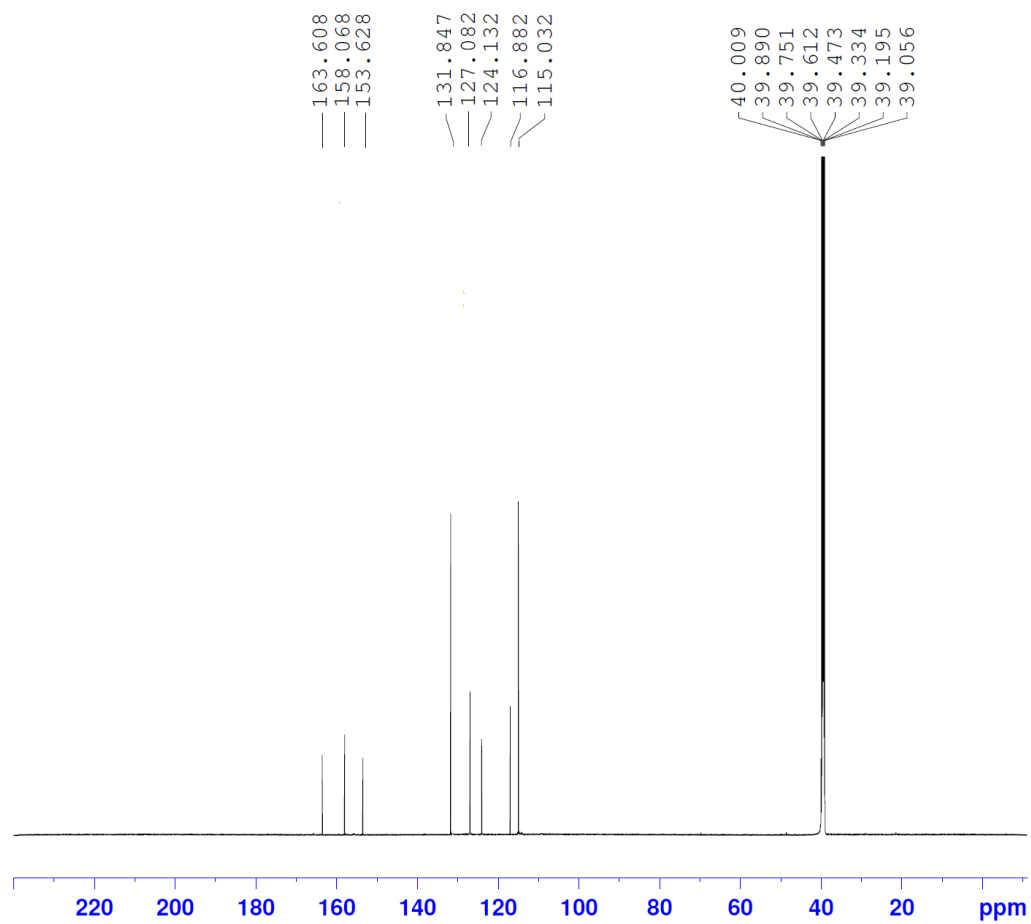

**Figure S4.** DEPT spectrum of hemimycalin C (**1**) ( $\text{DMSO}-d_6$ ).

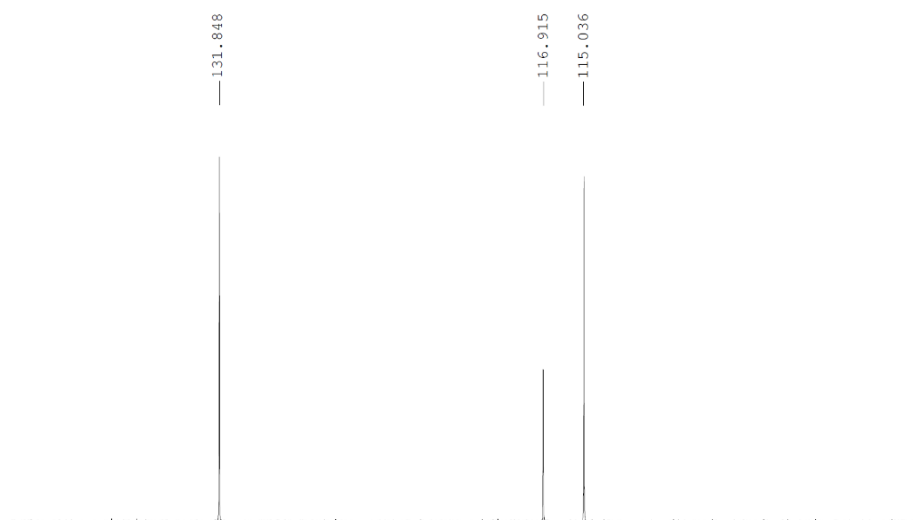

**Figure S5.** Multiplicity-edited HSQC spectrum of hemimycalin C (**1**) (DMSO- $d_6$ ).

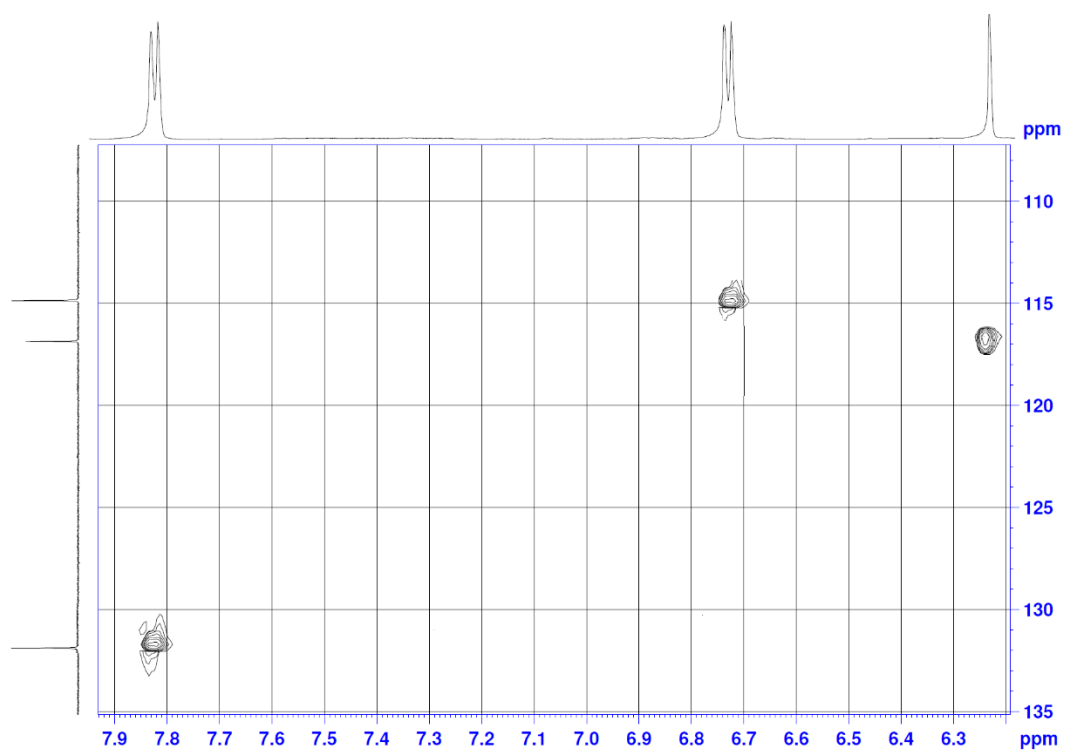

**Figure S6.**  $^1\text{H}$ - $^{13}\text{C}$  HMBC spectrum of hemimycalin C (**1**) ( $\text{DMSO-}d_6$ ).

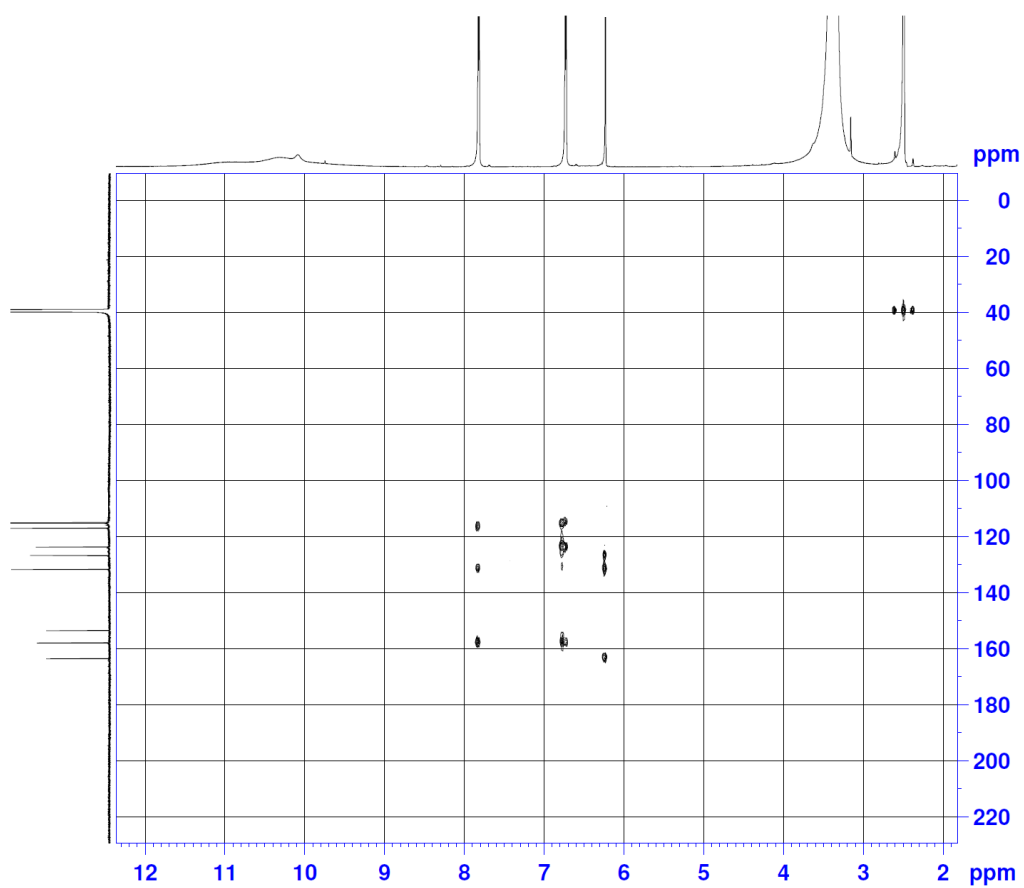

**Figure S7.**  $^1\text{H}$  NMR spectrum of hemimycalin D (**2**) ( $\text{DMSO-}d_6$ ).

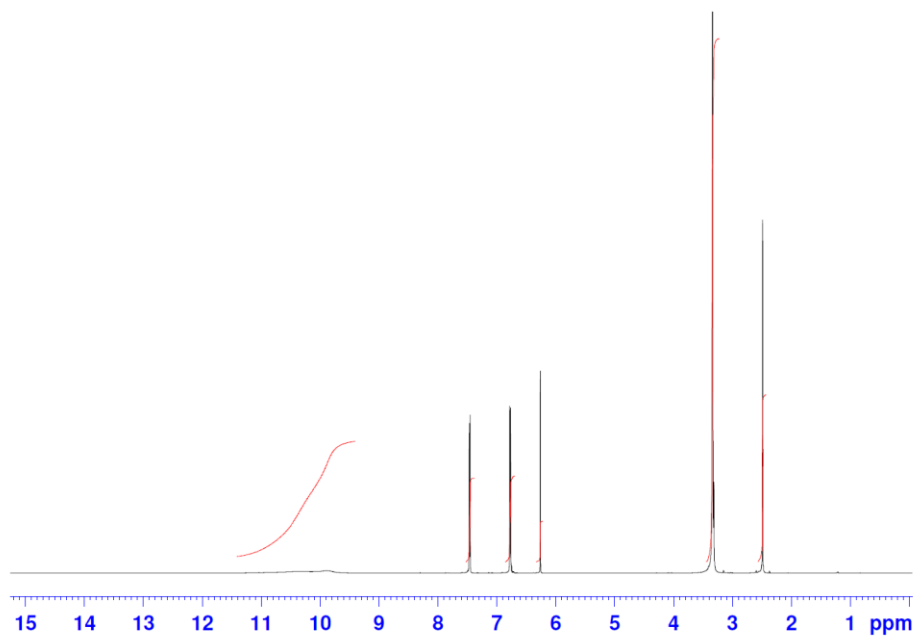

**Figure S8.** Expansion of  $^1\text{H}$  NMR spectrum of hemimycalin D (**2**) ( $\text{DMSO-}d_6$ ).

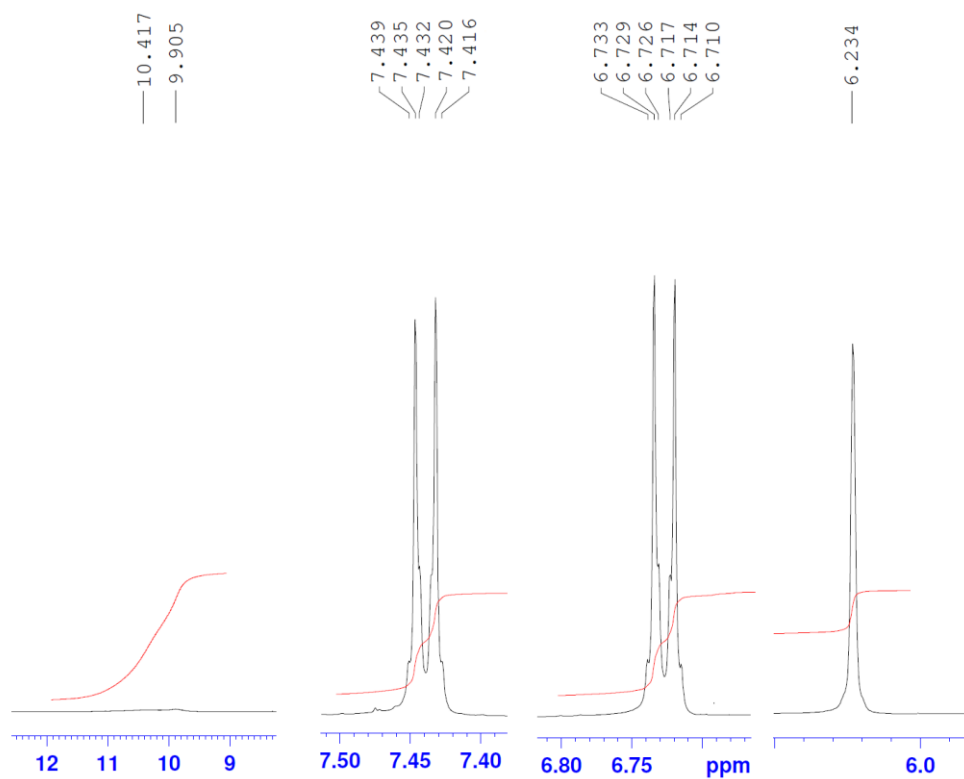

**Figure S9.**  $^{13}\text{C}$  NMR spectrum of hemimycalin D (**2**) ( $\text{DMSO-}d_6$ ).

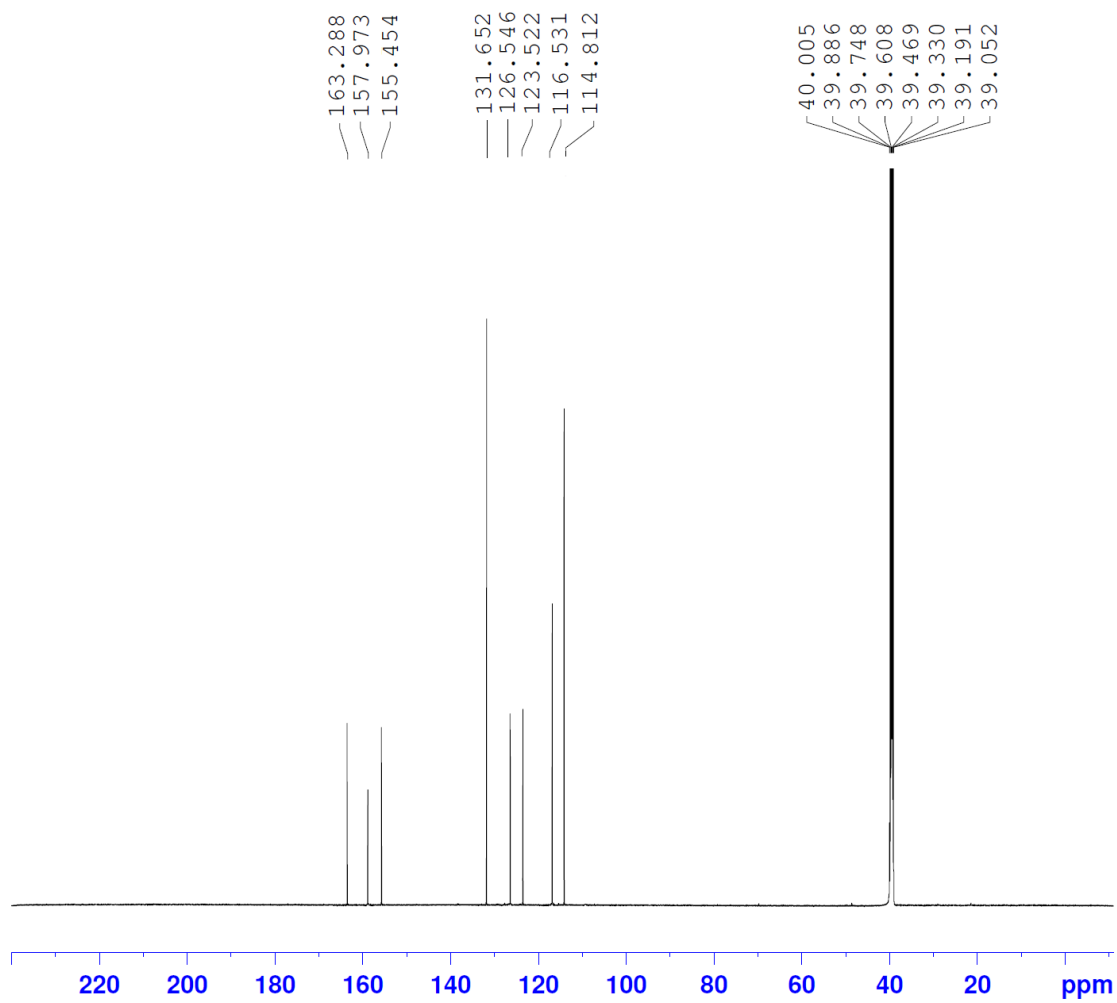

**Figure S10.** Multiplicity-edited HSQC spectrum of hemimycalin D (**2**) (DMSO-*d*<sub>6</sub>).

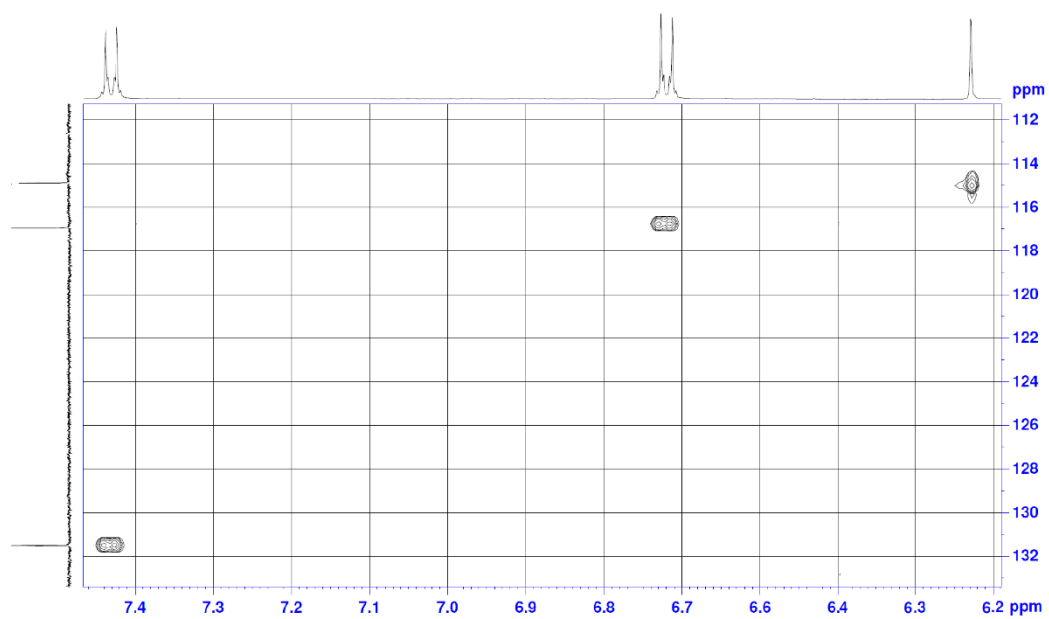



**Figure S11.**  $^1\text{H}$ - $^{13}\text{C}$  HMBC spectrum of hemimycalin D (**2**) ( $\text{DMSO-}d_6$ ).

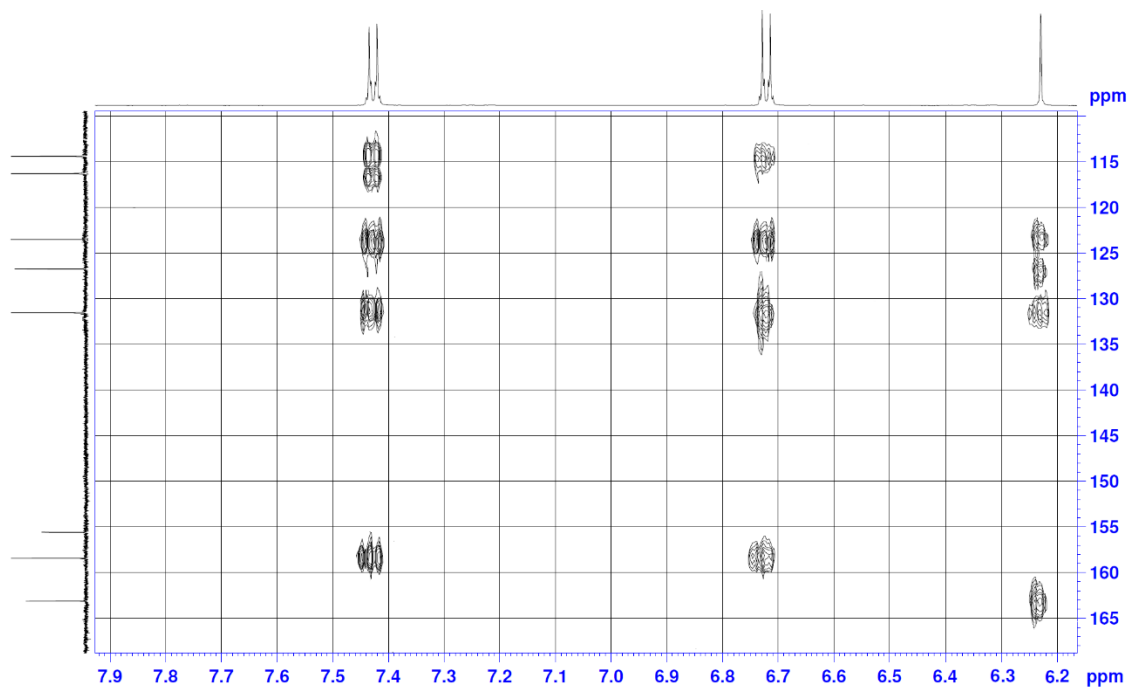

**Figure S12.**  $^1\text{H}$  NMR spectrum of hemimycalin E (**3**) ( $\text{DMSO}-d_6$ ).

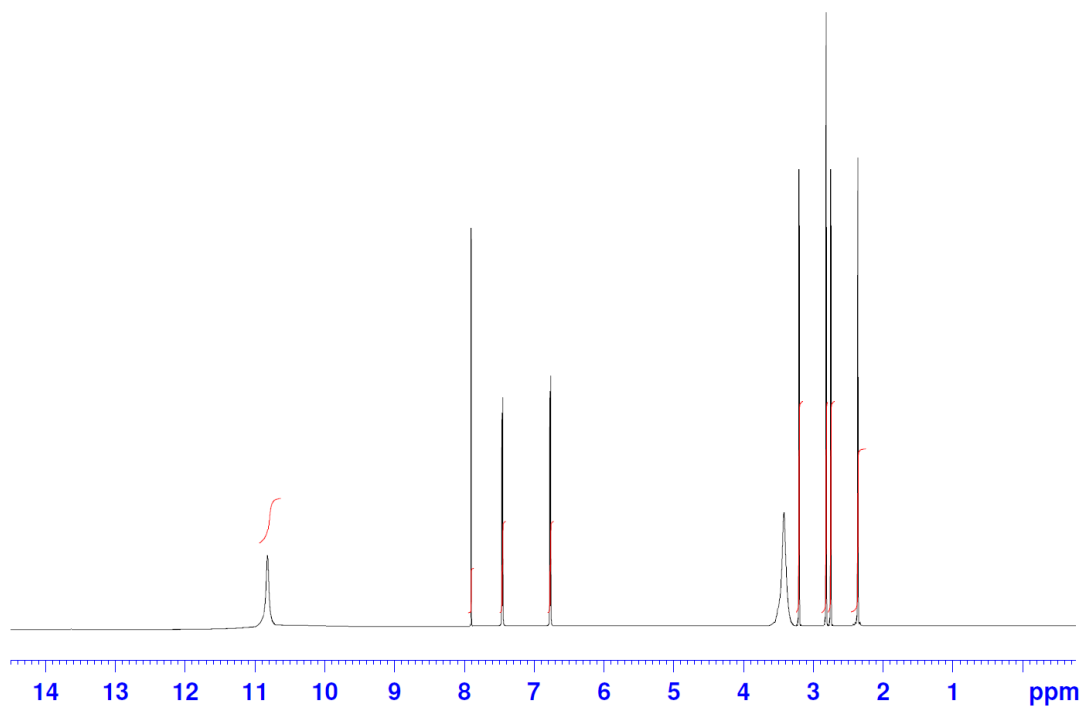

**Figure S13** Expansion of  $^1\text{H}$  NMR spectrum of hemimycalin E (**3**) ( $\text{DMSO}-d_6$ ).

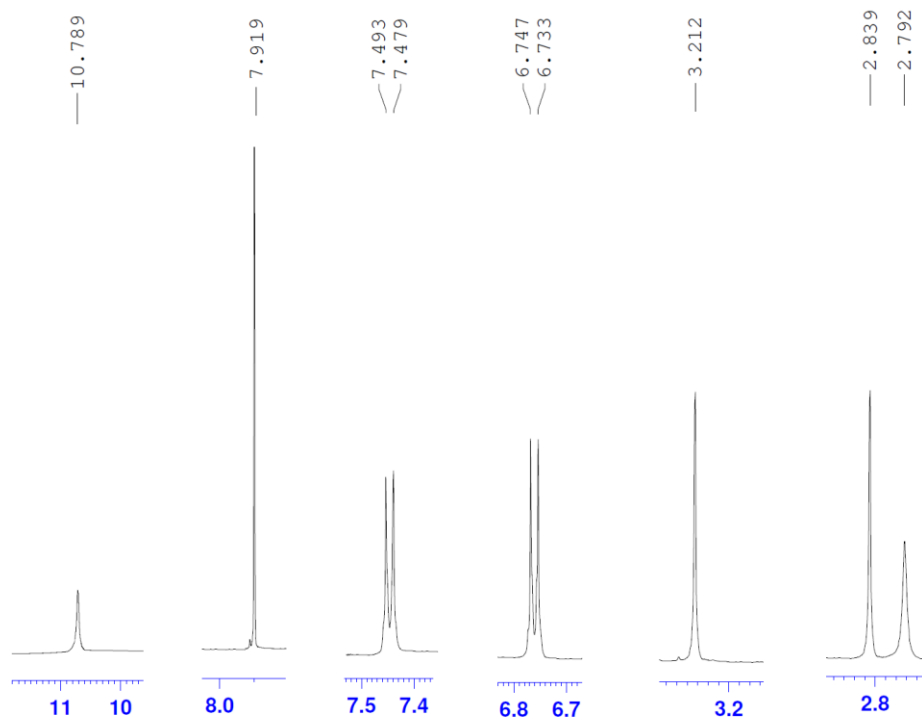

**Figure S14.**  $^{13}\text{C}$  NMR spectrum of hemimycalin E (**3**) ( $\text{DMSO-}d_6$ ).

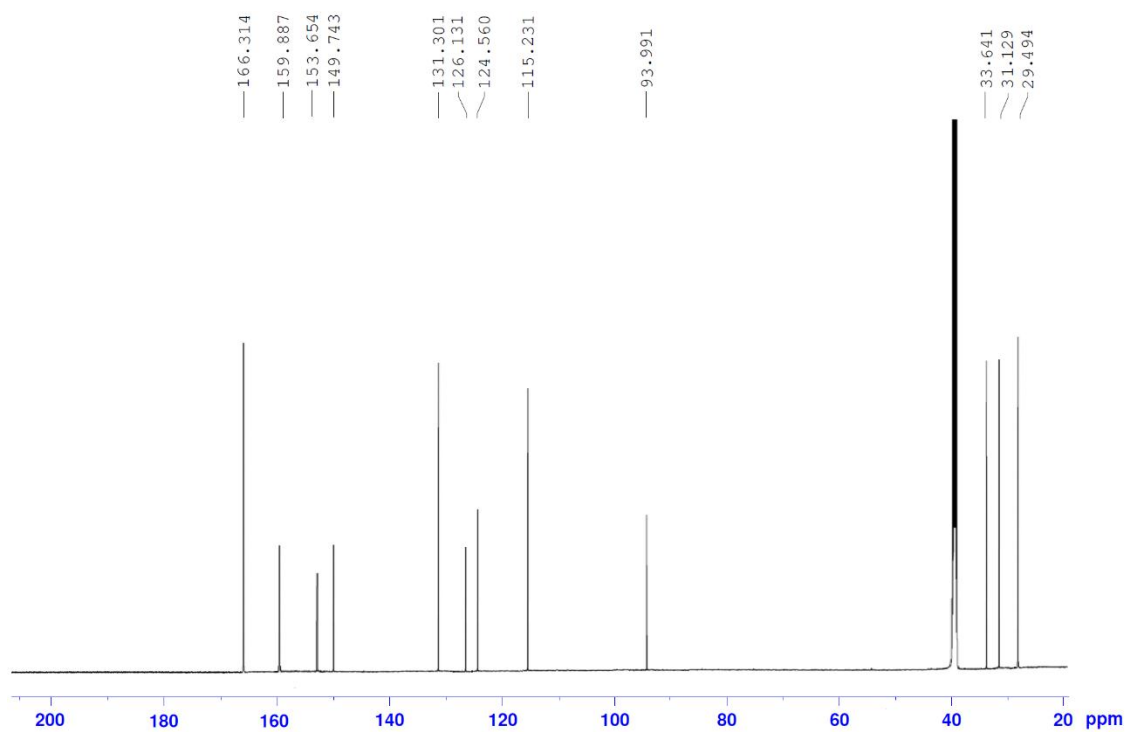

**Figure S15.** Multiplicity-edited HSQC spectrum of hemimycalin E (**3**) (DMSO-*d*<sub>6</sub>).

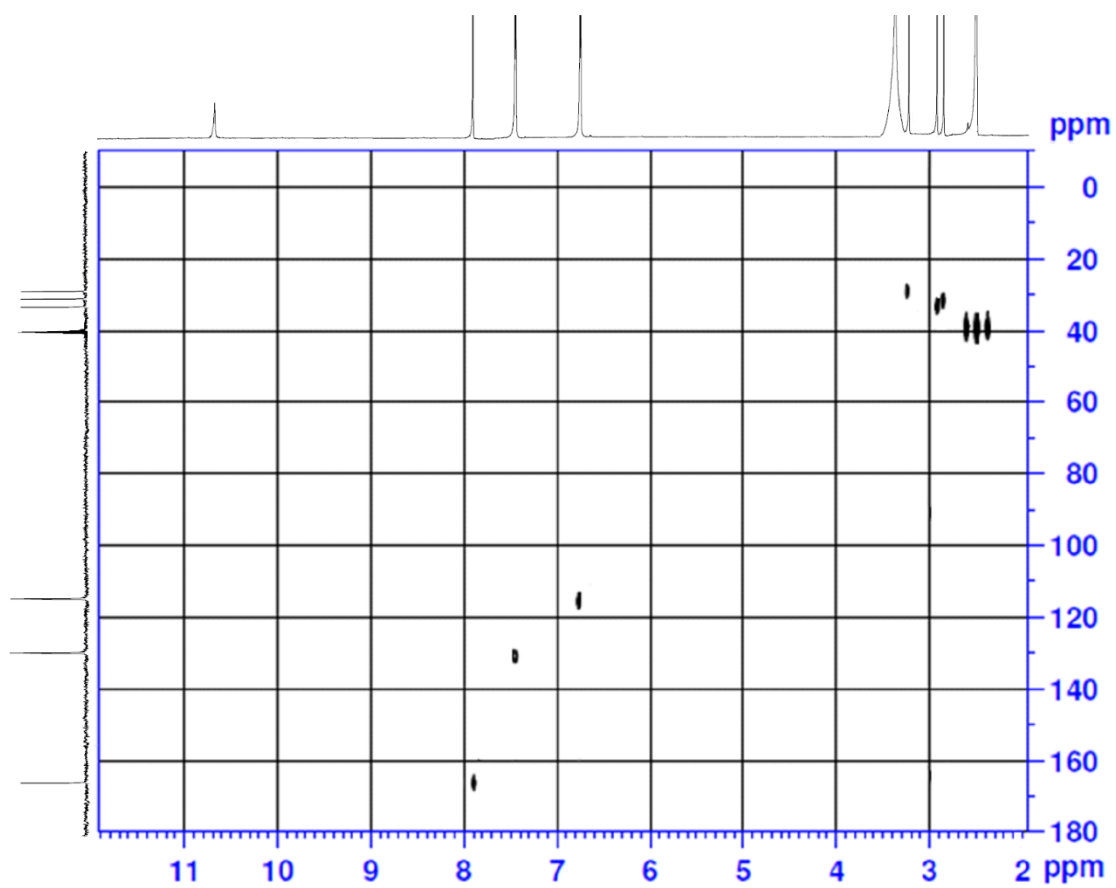

**Figure S16.**  $^1\text{H}$ - $^{13}\text{C}$  HMBC spectrum of hemimycalin E (**3**) ( $\text{DMSO-}d_6$ ).

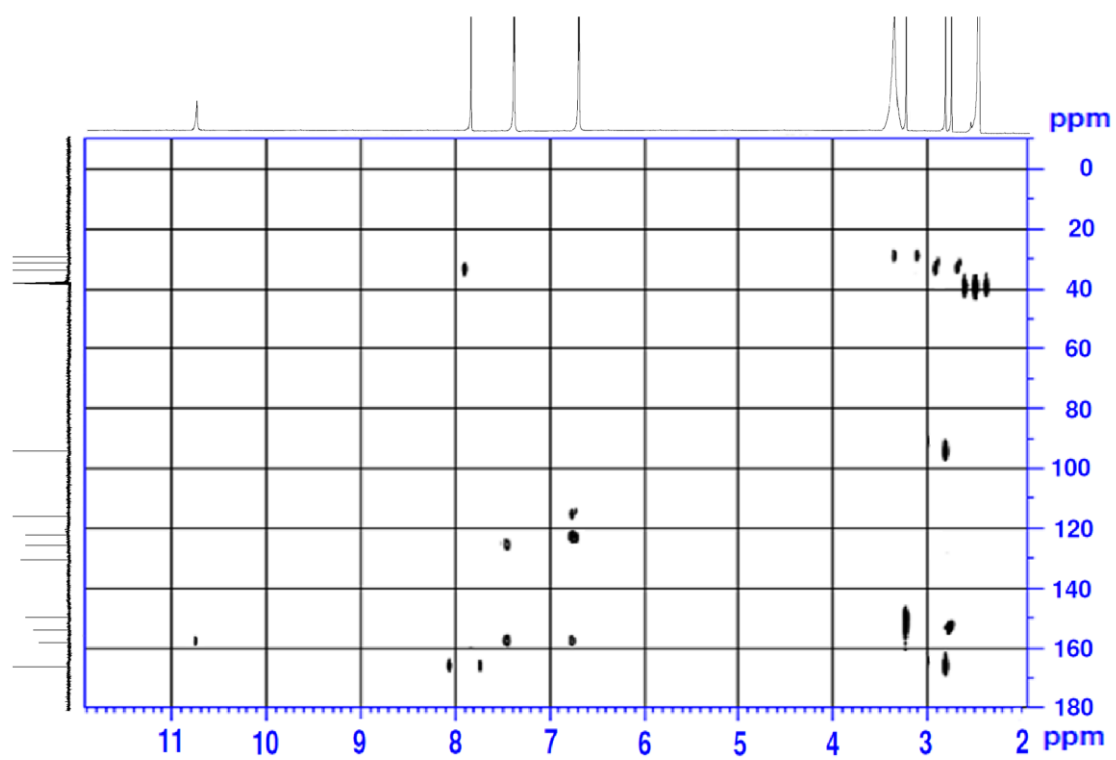

**Figure S17.**  $^1\text{H}$ - $^{13}\text{H}$  NOESY spectrum of hemimycalin E (**3**) ( $\text{DMSO-}d_6$ ).

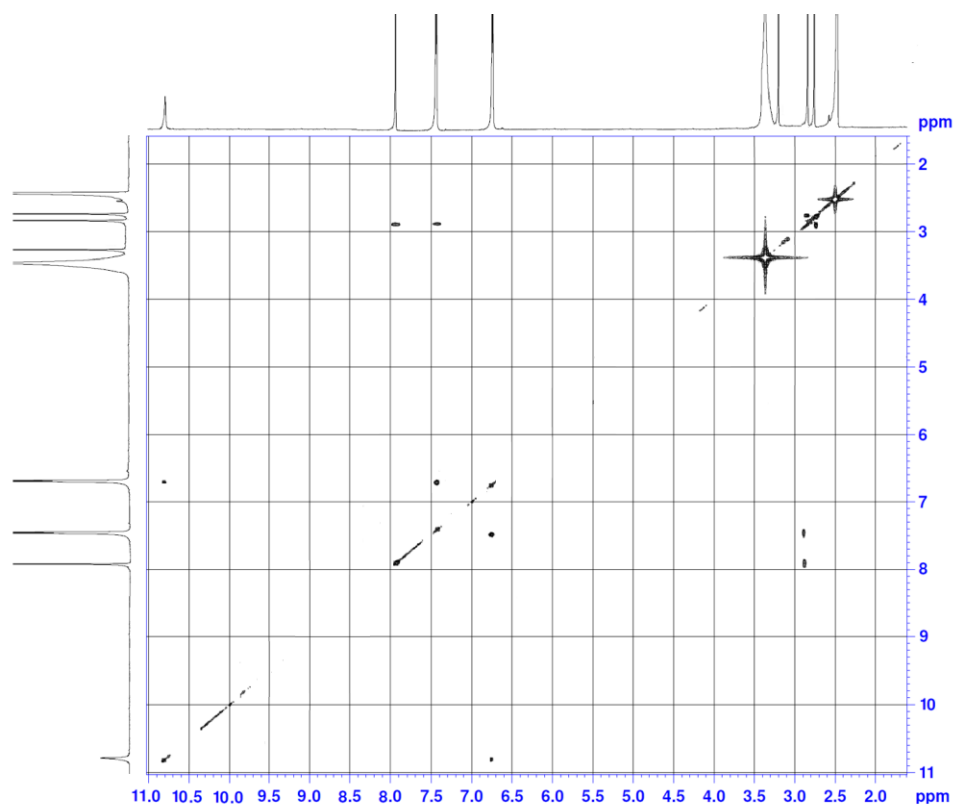

**Figure S18.** Dose-response curves of compounds **1-3** against MDA-MB-231.

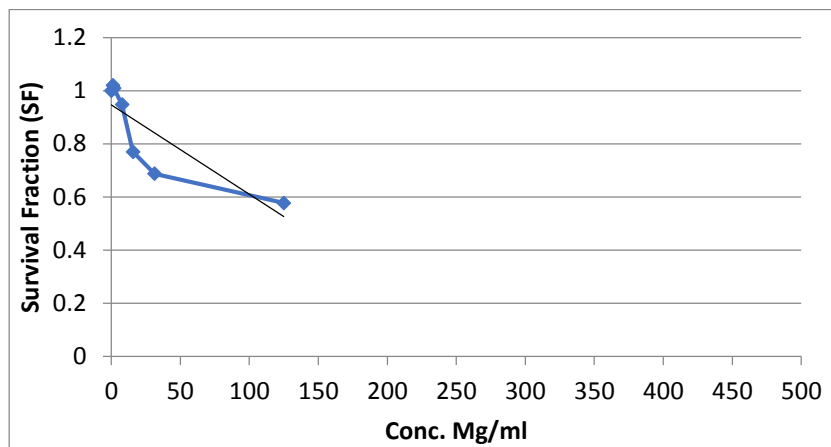

Compound **1** against MDA-MB-231

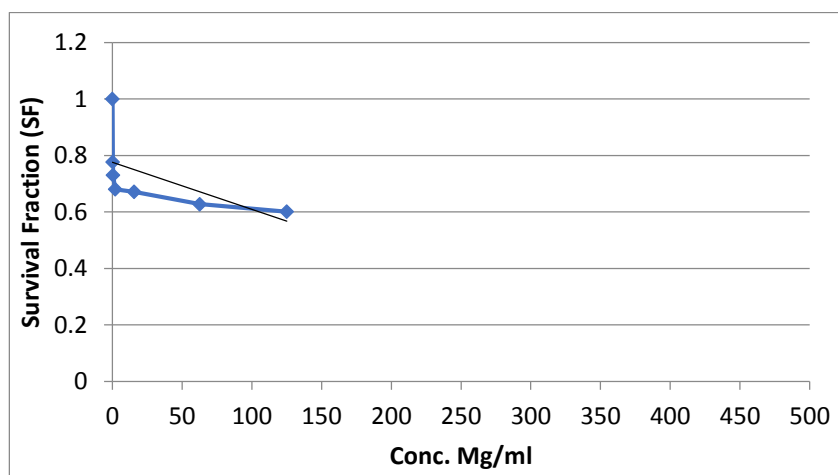

Compound **2** against MDA-MB-231

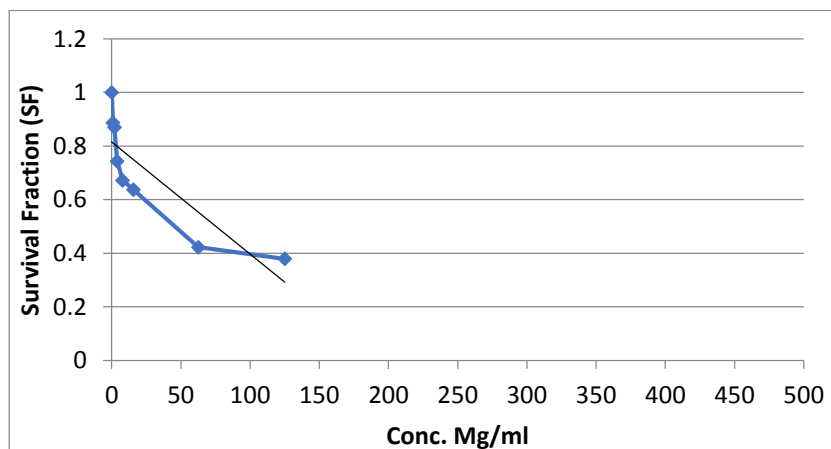

Compound **3** against MDA-MB-231

**Figure S19.** Dose-response curves of compounds **1-3** against HC T116.

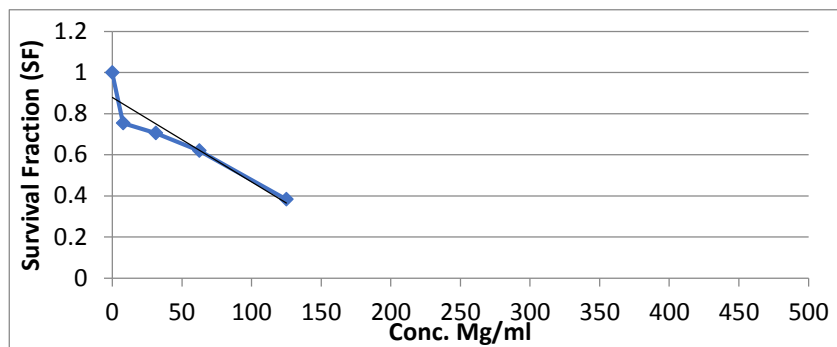

Compound **1** against HCT 116

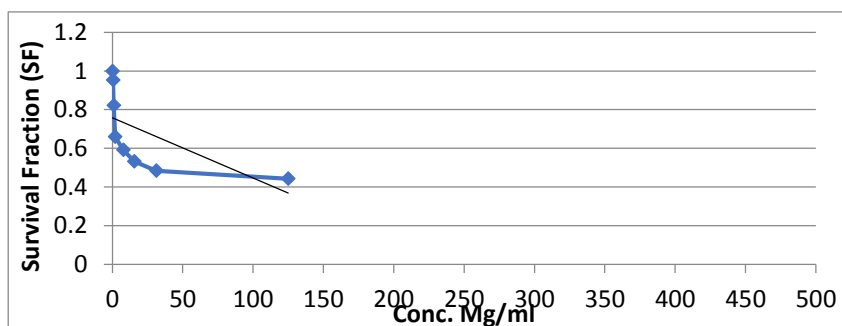

Compound **2** against HCT 116

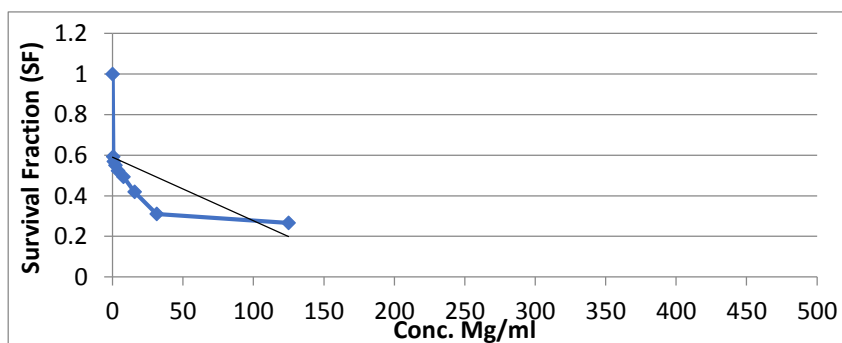

Compound **3** against HCT 116
